# Supplementary material
Source: MDPI journal article supplement (https://www.mdpi.com/1873-149X/30/4/46)
Supplement: s1 [file s1]

## Supplementary Materials

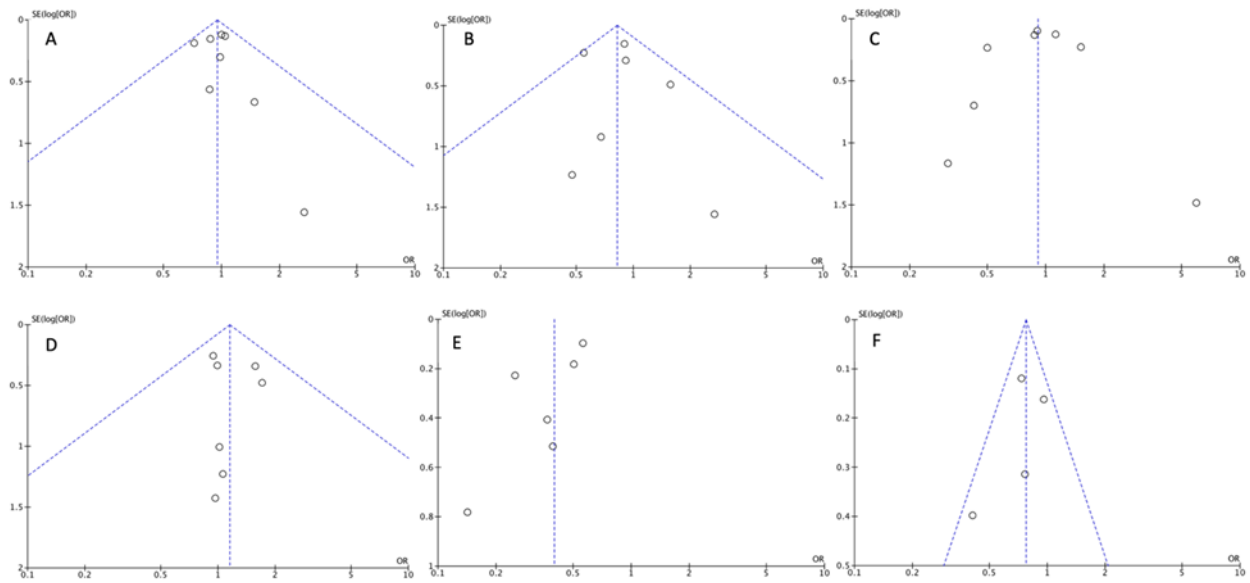

**Figure S1. Funnel plots for estimation of systematic bias.**

A - All-cause mortality; B - cardiovascular death; C - Myocardial Infarction; D - Stroke; E – Unplanned coronary revascularization; F - All-cause mortality (patients with left ventricular systolic dysfunction).

**Table S1. Assessment of risk of bias in the included studies using RoB2 for RCTs studies.**

| Study, year         | Randomization process | Deviation from intervention | Missing outcome data | Measurement of the outcome | Selection of the results | Overall |
|---------------------|-----------------------|-----------------------------|----------------------|----------------------------|--------------------------|---------|
| COURAGE, 2007       | L                     | L                           | L                    | L                          | L                        | L       |
| JSAP, 2008          | L                     | L                           | L                    | L                          | L                        | L       |
| BARI 2D, 2009       | L                     | L                           | L                    | L                          | S                        | S       |
| MASS II, 2010       | L                     | L                           | L                    | L                          | L                        | L       |
| HEART, 2011         | L                     | L                           | L                    | L                          | S                        | S       |
| Won H., 2016        | L                     | L                           | L                    | L                          | L                        | L       |
| STICH, 2016         | L                     | L                           | L                    | L                          | L                        | L       |
| FAME 2, 2018        | L                     | L                           | L                    | L                          | L                        | L       |
| EUROCTO, 2018       | L                     | S                           | L                    | L                          | L                        | S       |
| ISCHEMIA, 2020      | L                     | L                           | L                    | L                          | L                        | L       |
| REVIVED-BCIS2, 2022 | L                     | L                           | L                    | L                          | L                        | L       |

\* - L: low; S: some concerns; H: high, RCTs - randomized clinical trials

## **Overall risk-of-bias judgment**

### **Criteria**

**Low risk of bias** - The study is judged to be at low risk of bias for all domains for this result.

**Some concerns** - The study is judged to raise some concerns in at least one domain for this result, but not to be at high risk of bias for any domain.

**High risk of bias** - The study is judged to be at high risk of bias in at least one domain for this result. The study is judged to have some concerns for multiple domains in a way that substantially lowers confidence in the result.

**Table S2. Clinical characteristics of the patients.**

| Name<br>research,<br>year | Age, years        |                   | Body-mass<br>index, kg/m <sup>2</sup> |                         | Hypertension,<br>no. (%) |               | Diabetes, no.<br>(%) |               | Previous<br>myocardial<br>infarction,<br>no. (%) |               | Cerebrovascu<br>lar disease,<br>no. (%) |              | Renal<br>insufficiency,<br>no. (%) |         | Peripheral<br>vascular<br>disease, no.<br>(%) |             | Left<br>ventricular<br>ejection<br>fraction, % |                   |
|---------------------------|-------------------|-------------------|---------------------------------------|-------------------------|--------------------------|---------------|----------------------|---------------|--------------------------------------------------|---------------|-----------------------------------------|--------------|------------------------------------|---------|-----------------------------------------------|-------------|------------------------------------------------|-------------------|
|                           | OMT               | INV               | OMT                                   | INV                     | OMT                      | INV           | OMT                  | INV           | OMT                                              | INV           | OMT                                     | INV          | OMT                                | INV     | OMT                                           | INV         | OMT                                            | INV               |
| COURAGE,<br>2007          | 61.8±<br>9.7      | 61.5±<br>10.1     | 28.7±<br>0.18                         | 28.5±<br>0.19           | 764<br>(67)              | 757<br>(66)   | 399<br>(35)          | 367<br>(32)   | 439<br>(39)                                      | 437<br>(38)   | 102<br>(9)                              | 100<br>(9)   | nd                                 | nd      | nd                                            | nd          | 60.9±<br>10.3                                  | 60.8±<br>11.2     |
| JSAP, 2008                | 64.2±<br>7.6      | 64.5±<br>7.2      | 24.1±<br>2.8                          | 24.3±<br>3.3            | 121<br>(63.4)            | 119<br>(63.3) | 76<br>(39.8)         | 76<br>(40.4)  | 28<br>(15.1)                                     | 25<br>(14.0)  | 10<br>(5.4)                             | 13<br>(7.3)  | nd                                 | nd      | nd                                            | nd          | 65.8±<br>9.6                                   | 64.0±<br>9.7      |
| BARI 2D,<br>2009          | 62.4±<br>9.0      | 62.3±<br>8.8      | 32.2±<br>6.2                          | 32.0±<br>6.3            | nd                       | nd            | 991<br>(100)         | 953<br>(100)  | (32.4)                                           | (31.7)        | 119<br>(10)                             | 111<br>(9.5) | nd                                 | nd      | (23.7)                                        | (23.7)      | 57.3±<br>10.7                                  | 57.0±<br>11.3     |
| MASS II,<br>2010          | 60.0±<br>9.0      | 60.0±<br>9.0      | nd                                    | nd                      | 111<br>(55)              | 252<br>(61,8) | 73<br>(36)           | 106<br>(26)   | 79<br>(39)                                       | 189<br>(46)   | nd                                      | nd           | nd                                 | nd      | nd                                            | nd          | 68.0±<br>7.0                                   | 67.0±<br>8.0      |
| HEART,<br>2011            | 69<br>(60-<br>74) | 65<br>(58-<br>70) | 27,4<br>(24,2-<br>31,5)               | 27,5<br>(24,8-<br>32,0) | 34<br>(49)               | 35<br>(51)    | 23<br>(33)           | 28<br>(41)    | 50<br>(73)                                       | 51<br>(74)    | 8 (12)                                  | 12<br>(17)   | nd                                 | nd      | 11<br>(16)                                    | 16<br>(23)  | LVEF<35%                                       |                   |
| Won H.,<br>2016           | 78.3±4.7          | 78.0±4.2          | nd                                    | nd                      | 65<br>(74.7)             | 74<br>(82.2)  | 28<br>(32.2)         | 36<br>(40.0)  | 4 (4.6)                                          | 6 (6.7)       | -                                       | -            | 0                                  | 2 (2.2) | nd                                            | nd          | LVEF≥45%                                       |                   |
| STICH,<br>2016            | 59<br>(53-<br>67) | 60<br>(54-<br>68) | 27<br>(24-<br>30)                     | 27<br>(24-<br>30)       | 370<br>(61)              | 358<br>(59)   | 238<br>(40)          | 240<br>(39)   | 472<br>(78)                                      | 462<br>(76)   | 41 (7)                                  | 51 (8)       | 45 (7)                             | 49 (8)  | nd                                            | nd          | 28<br>(21-<br>34)                              | 27<br>(22-<br>33) |
| EUROCTO,<br>2018          | 64.7±<br>9.9      | 65.2±<br>9.7      | 28.3±<br>5.2                          | 28.4±<br>4.9            | 98<br>(71.5)             | 189<br>(73.0) | 40<br>(29.2)         | 85<br>(32.8)  | 25<br>(18.3)                                     | 59<br>(22.8)  | nd                                      | nd           | nd                                 | nd      | nd                                            | nd          | 55.7±<br>10.8                                  | 54.5±<br>10.8     |
| FAME 2,<br>2018           | 63.9±<br>9.6      | 63.5±<br>9.4      | 28.4±<br>4.6                          | 28.3±<br>4.3            | 343<br>(77.8)            | 347<br>(77.6) | 117<br>(26.5)        | 123<br>(27.5) | 165<br>(37.4)                                    | 164<br>(36.7) | 28<br>(6.3)                             | 33<br>(7.4)  | 12<br>(2.7)                        | 8 (1.8) | 47<br>(10.7)                                  | 43<br>(9.6) | LVEF≥50%                                       |                   |

|                                                           |                   |                   |              |              |                |                |                |                |               |               |              |              |    |    |             |              |                   |                   |
|-----------------------------------------------------------|-------------------|-------------------|--------------|--------------|----------------|----------------|----------------|----------------|---------------|---------------|--------------|--------------|----|----|-------------|--------------|-------------------|-------------------|
| ISCHEMIA,<br>2020                                         | 64<br>(58-<br>70) | 64<br>(58-<br>70) | nd           | nd           | 1895<br>(73.4) | 1894<br>(73.4) | 1071<br>(42.2) | 1093<br>(41.4) | 496<br>(19.2) | 495<br>(19.2) | 176<br>(6.8) | 201<br>(7.8) | nd | nd | 88<br>(3.4) | 116<br>(4.5) | 60<br>(55-<br>65) | 60<br>(55-<br>65) |
| ISCHEMIA,<br>left<br>ventricular<br>dysfunctio<br>n, 2020 | 64 (57.71)        |                   | nd           | nd           | 167 (76.6)     |                | 106 (48.0)     |                | 77 (35.2)     |               | nd           | nd           | nd | nd | 10 (4.5)    |              | 35-45             |                   |
| REVIVED-<br>BCIS2,<br>2022                                | 68.8±<br>9.1      | 70.0±<br>9.0      | 28.7±<br>5.4 | 28,4±<br>5.5 | 207<br>(59)    | 184<br>(53)    | 153<br>(43)    | 136<br>(39)    | 197<br>(56)   | 175<br>(50)   | 46<br>(13)   | 38<br>(11)   | nd | nd | 46<br>(13)  | 48<br>(14)   | 27.0±<br>6.9      | 27.0±<br>6.6      |

\* - OMT - optimal medical therapy; INV - invasive strategy; nd - no data.
